# Supplementary material
Source: PubMed Central journal article supplement (PMC6707875)
Supplement: NIHMS1531148-supplement-1.pdf [file NIHMS1531148-supplement-1.pdf]

**Supplemental Table S1.** Cross tabulation of normal-weight/overweight at 7 and 13 years and in early adulthood.\*

|                      |                | <b>Early adulthood</b> |      |                   |     |
|----------------------|----------------|------------------------|------|-------------------|-----|
|                      |                | <b>Normal weight</b>   |      | <b>Overweight</b> |     |
|                      |                | n                      | %    | n                 | %   |
| <b>Age 7 years</b>   |                |                        |      |                   |     |
| <b>Normal-weight</b> | Non-cases      | 56,311                 | 90.4 | 4,212             | 6.8 |
|                      | Combined cases | 230                    | 86.5 | 20                | 7.5 |
| <b>Overweight</b>    | Non-cases      | 914                    | 1.5  | 887               | 1.4 |
|                      | Combined cases | 5                      | 1.9  | 11                | 4.1 |
| <b>Age 13 years</b>  |                |                        |      |                   |     |
| <b>Normal-weight</b> | Non-cases      | 56,496                 | 89.6 | 3,269             | 5.2 |
|                      | Combined cases | 231                    | 85.2 | 17                | 6.3 |
| <b>Overweight</b>    | Non-cases      | 1,397                  | 2.2  | 1,889             | 3.0 |
|                      | Combined cases | 9                      | 3.3  | 14                | 5.2 |

\*Overweight defined by IOTF criteria until and including age 17 years and by WHO from 18 years onwards.

**Supplemental Table S2.** Adjusted hazard ratios (HR)\* and 95% confidence intervals (CI) for associations between quintiles of body mass index and esophageal and gastric cardia adenocarcinoma incidence.

| Body Mass Index (kg/m <sup>2</sup> ) | Total (n) | Esophageal Adenocarcinoma |                   | Gastric Cardia Adenocarcinoma |                   | Combined Cases |                   |
|--------------------------------------|-----------|---------------------------|-------------------|-------------------------------|-------------------|----------------|-------------------|
|                                      |           | Cases (n)                 | HR (95% CI)       | Cases (n)                     | HR (95% CI)       | Cases (n)      | HR (95% CI)       |
| <b>Age, 7 years</b>                  |           |                           |                   |                               |                   |                |                   |
| 11.68–14.52                          | 12,518    | 30                        | 1.54 (0.88, 2.69) | 19                            | 0.67 (0.37, 1.18) | 49             | 1.02 (0.69, 1.51) |
| >14.52–15.10                         | 12,518    | 25                        | 1.22 (0.68, 2.18) | 28                            | 0.94 (0.56, 1.57) | 53             | 1.06 (0.72, 1.55) |
| >15.10–15.63                         | 12,517    | 21                        | Referent          | 30                            | Referent          | 51             | Referent          |
| >15.63–16.32                         | 12,519    | 36                        | 1.69 (0.99, 2.90) | 26                            | 0.88 (0.52, 1.48) | 62             | 1.21 (0.84, 1.76) |
| >16.32–25.55                         | 12,518    | 29                        | 1.37 (0.78, 2.41) | 22                            | 0.75 (0.43, 1.29) | 51             | 1.01 (0.68, 1.48) |
| P for trend†                         |           |                           | 0.2               |                               | 0.5               |                | 0.7               |
| <b>Age, 13 years</b>                 |           |                           |                   |                               |                   |                |                   |
| 12.53–16.42                          | 12,664    | 24                        | 1.07 (0.60, 1.88) | 18                            | 0.59 (0.33, 1.04) | 42             | 0.79 (0.53, 1.17) |
| >16.42–17.33                         | 12,661    | 25                        | 1.04 (0.60, 1.83) | 26                            | 0.80 (0.48, 1.33) | 51             | 0.90 (0.62, 1.31) |
| >17.33–18.25                         | 12,668    | 24                        | Referent          | 33                            | Referent          | 57             | Referent          |
| >18.25–19.57                         | 12,664    | 29                        | 1.20 (0.70, 2.06) | 20                            | 0.60 (0.35, 1.05) | 49             | 0.86 (0.58, 1.25) |
| >19.57–35.07                         | 12,665    | 42                        | 1.79 (1.08, 2.95) | 30                            | 0.93 (0.57, 1.53) | 72             | 1.29 (0.91, 1.83) |
| P for trend†                         |           |                           | 0.5               |                               | 0.2               |                | 0.4               |
| <b>Early Adulthood</b>               |           |                           |                   |                               |                   |                |                   |
| 14.23–19.64                          | 12,939    | 24                        | 1.06 (0.60, 1.86) | 13                            | 0.47 (0.25, 0.91) | 37             | 0.74 (0.49, 1.12) |
| >19.64–20.78                         | 12,937    | 31                        | 1.26 (0.75, 2.14) | 27                            | 0.92 (0.55, 1.55) | 58             | 1.08 (0.74, 1.56) |
| >20.78–21.85                         | 12,941    | 25                        | Referent          | 30                            | Referent          | 55             | Referent          |
| >21.85–23.29                         | 12,939    | 24                        | 0.96 (0.55, 1.68) | 28                            | 0.94 (0.56, 1.57) | 52             | 0.95 (0.65, 1.39) |
| >23.29–41.63                         | 12,939    | 42                        | 1.73 (1.05, 2.85) | 31                            | 1.09 (0.66, 1.80) | 73             | 1.38 (0.97, 1.96) |
| P for trend†                         |           |                           | 0.1               |                               | 0.3               |                | 0.2               |

\*Adjusted for education level and age at conscription. †Tests of trend were performed using linear splines with three knot points.

**Supplemental Table S3.** Adjusted hazard ratios (HR)\* and 95% confidence intervals (CI) for associations between per unit increase in BMI z-score† and esophageal and gastric cardia adenocarcinoma incidence.

| Body Mass Index (kg/m <sup>2</sup> ) | Total (n) | Esophageal Adenocarcinoma |                   | Gastric Cardia Adenocarcinoma |                   | Combined Cases |                   |
|--------------------------------------|-----------|---------------------------|-------------------|-------------------------------|-------------------|----------------|-------------------|
|                                      |           | Cases (n)                 | HR (95% CI)       | Cases (n)                     | HR (95% CI)       | Cases (n)      | HR (95% CI)       |
| <b>Age, 7 years</b>                  | 62,590    | 141                       | 1.07 (0.89, 1.29) | 125                           | 1.05 (0.86, 1.27) | 266            | 1.06 (0.93, 1.21) |
| <b>Age, 13 years</b>                 | 63,322    | 144                       | 1.24 (1.03, 1.49) | 127                           | 1.13 (0.93, 1.37) | 271            | 1.19 (1.04, 1.36) |
| <b>Early Adulthood</b>               | 64,695    | 146                       | 1.23 (1.03, 1.47) | 129                           | 1.24 (1.03, 1.50) | 275            | 1.23 (1.08, 1.40) |

\*Adjusted for education level and age at conscription. The results should be interpreted with caution as tests for linearity using linear splines indicated that the associations may be non-linear (p-values: esophageal adenocarcinoma age 7 years p=0.03, age 13 years p=0.08, early adulthood p=0.002; gastric cardia: age 7 years p=0.21, age 13 years p=0.23 early adulthood p=0.07; combined cases: age 7 year p=0.04, age 13 years p=0.10, early adulthood p=0.09). †The z-scores were age-specific and based on an internal reference. ‡Tests of trend were performed based on one unit increase in z-score.
